# Supplementary material for: Combinatorial control of gene expression by the three yeast repressors Mig1, Mig2 and Mig3
Source: PubMed Central journal article supplement (PMC2631581; doi:10.1186/1471-2164-9-601), 2008-12-16

**Figure S1: Microarray data for hexose transporters**

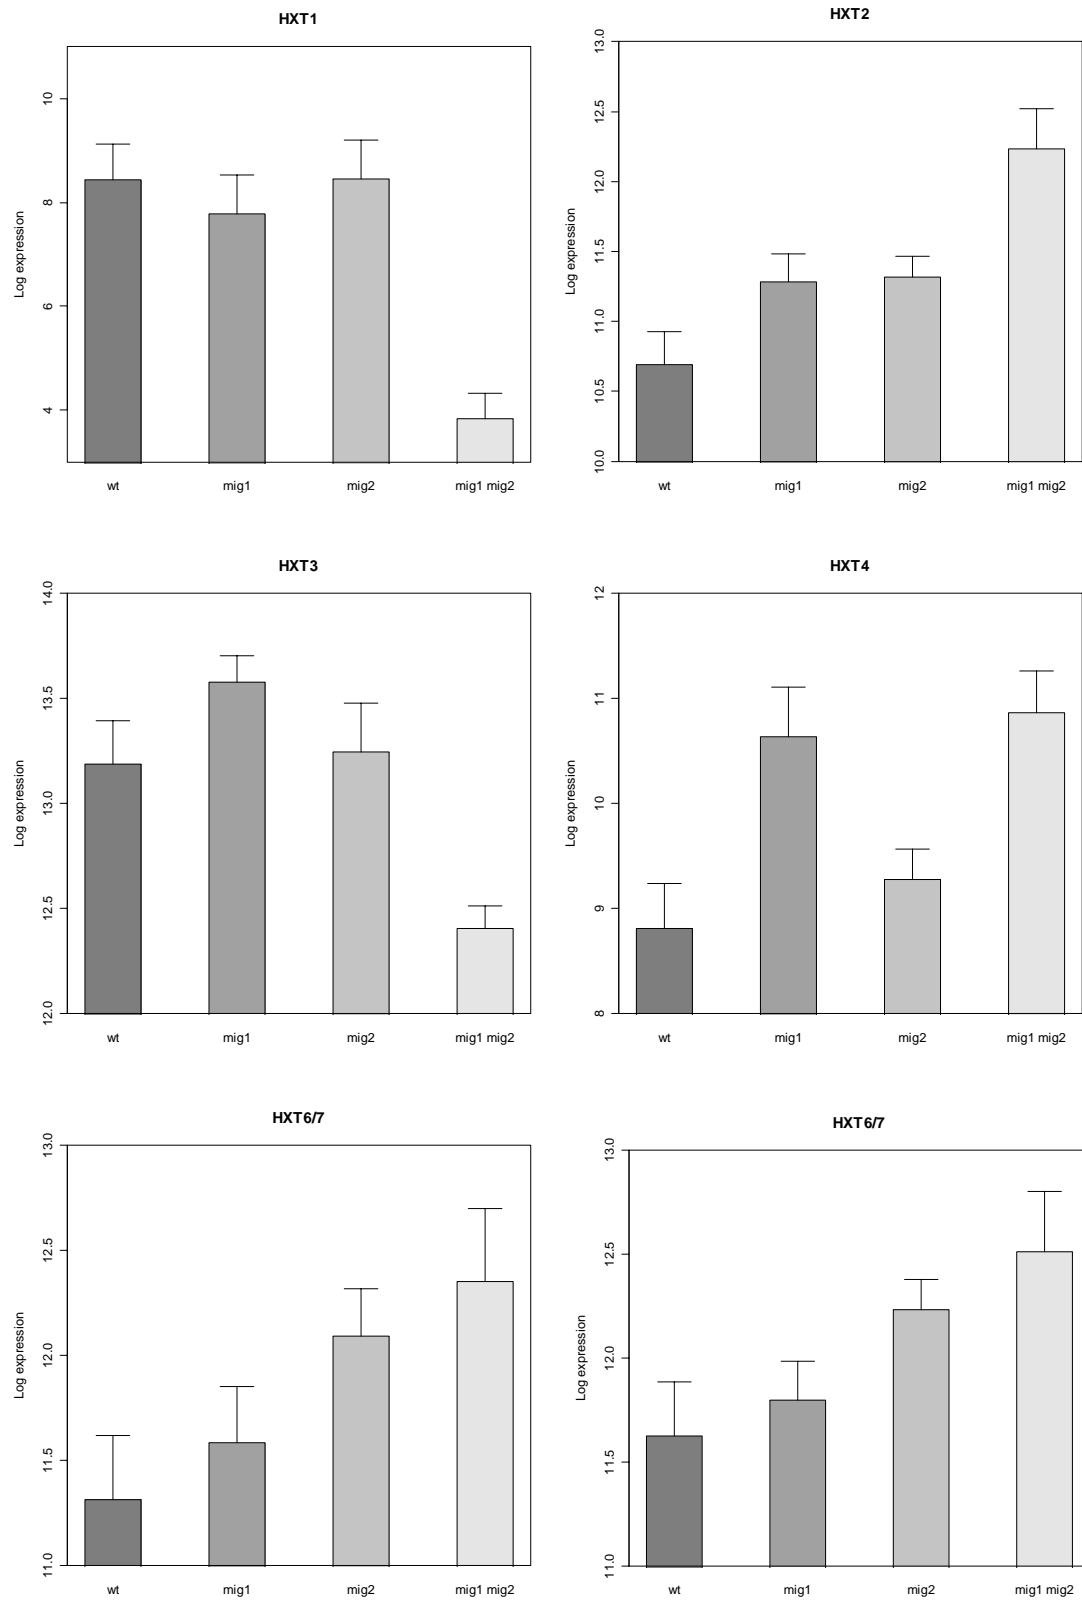

Supplement: 1471-2164-9-601-S3.pdf [file 1471-2164-9-601-S3.pdf]
